# Supplementary material for: A Zebrafish/Drosophila Dual System Model for Investigating Human Microcephaly
Source: MDPI journal article supplement (doi:10.3390/cells11172727), 2022-09-01
Supplement: s1 [file s1]

**Supplementary Table S1.** Raw count and percentage of larvae with mutated (MUT) (defined as head width < -2SD below average) or wildtype (WT) phenotype. Statistical significance for microcephalic forms (MUT) obtained in KD vs RESCUE experiments: Multiple comparisons one-way ANOVA; \* :  $P \leq 0.05$ ; \*\*:  $P \leq 0.01$ . This includes Sidak's amendment test for multiple comparisons.

| Number of embryos with WT or MUT phenotype             | Replicate 1 |          | Replicate 2 |          | Replicate 3 |            | Overall  |           | Statistics       |
|--------------------------------------------------------|-------------|----------|-------------|----------|-------------|------------|----------|-----------|------------------|
|                                                        | WT          | MUT      | WT          | MUT      | WT          | MUT        | WT       | MUT       |                  |
| <b>Trans</b> MO 4nM (n=153) <b>KD</b>                  | 2 (3%)      | 60 (97%) | 14 (30%)    | 33 (70%) | 4 (9%)      | 40 (91%)   | 20 (13%) | 133 (87%) |                  |
| <b>Trans</b> MO 4nM + mRNA 25pg (n=207) <b>RESCUE</b>  | 27 (40%)    | 41 (60%) | 38 (61%)    | 24 (32%) | 27 (35%)    | 50(65%)    | 92 (44%) | 115 (56%) | <b>0,043 *</b>   |
| <b>Splice</b> MO 4nM (n=147) <b>KD</b>                 | 13 (27%)    | 36 (73%) | 2 (3%)      | 58 (97%) | 2 (2%)      | 36 (0.95%) | 17 (12%) | 130 (88%) |                  |
| <b>Splice</b> MO 4nM + mRNA 25pg (n=157) <b>RESCUE</b> | 19 (42%)    | 26 (58%) | 32 (53%)    | 28 (47%) | 22 (42%)    | 30 (58%)   | 73 (46%) | 84 (54%)  | <b>0,0039 **</b> |

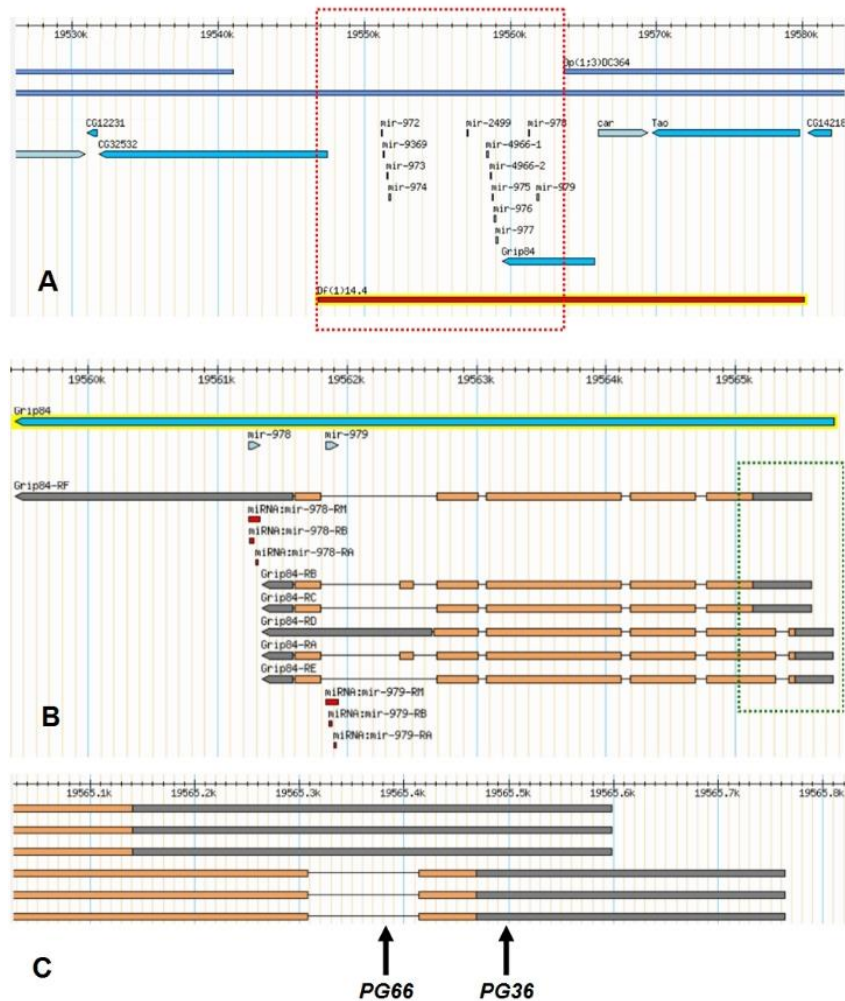

**Supplementary Figure S1.** Organisation of the *Grip84* gene in *Drosophila melanogaster*. (A) Genomic region surrounding the gene, showing a small deficiency, *Df(1)14.4* and left part of the duplication *Dp(1;3)DC364*. In the stock including both the deficiency and the duplication, the region in a red dashed rectangle is missing, therefore *Grip84* should be eliminated. Micro RNAs and *cg32532* are also eliminated. (B) structure of the gene, including alternatively used exons, the fragment in the dashed, green rectangle is magnified in (C) together with precise positions of two P elements.
